# Supplementary material
Source: Springer Nature journal article supplement (https://www.springermedizin.de/resource/supplementary/12960_2008_180_MOESM1_ESM.pdf/9570584)

Type of  
Employment  
Contract

90,00  
80,00  
70,00  
60,00  
50,00  
40,00  
30,00  
20,00  
10,00  
0,00

2002

2003

2004

2005

2006

Year

— % Non Permanent Workers

— % Permanent Workers

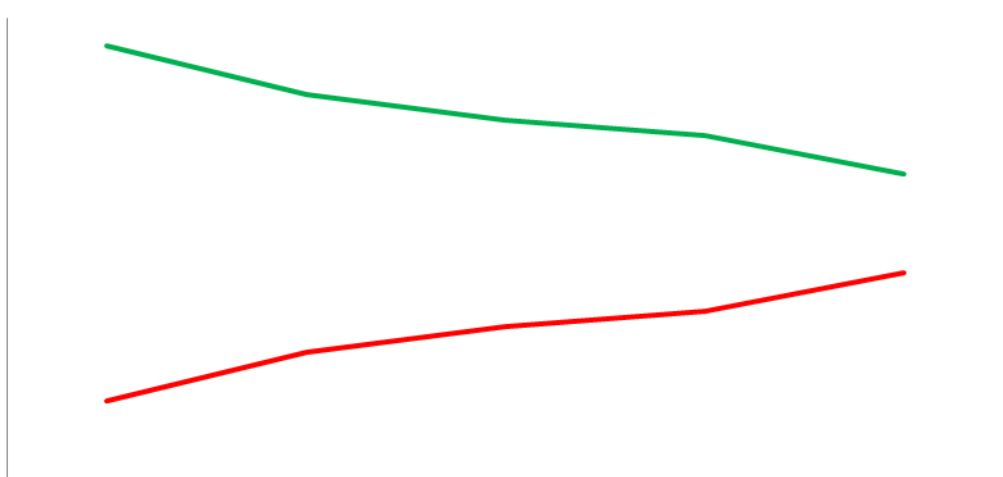

Supplement: MOESM1 [file 9570584]
